# Supplementary material for: Stimulation Montage Achieves Balanced Focality and Intensity
Source: MDPI journal article supplement (doi:10.3390/a15050169), 2022-05-20
Supplement: s1 [file s1]

## Robustness test results - MSE

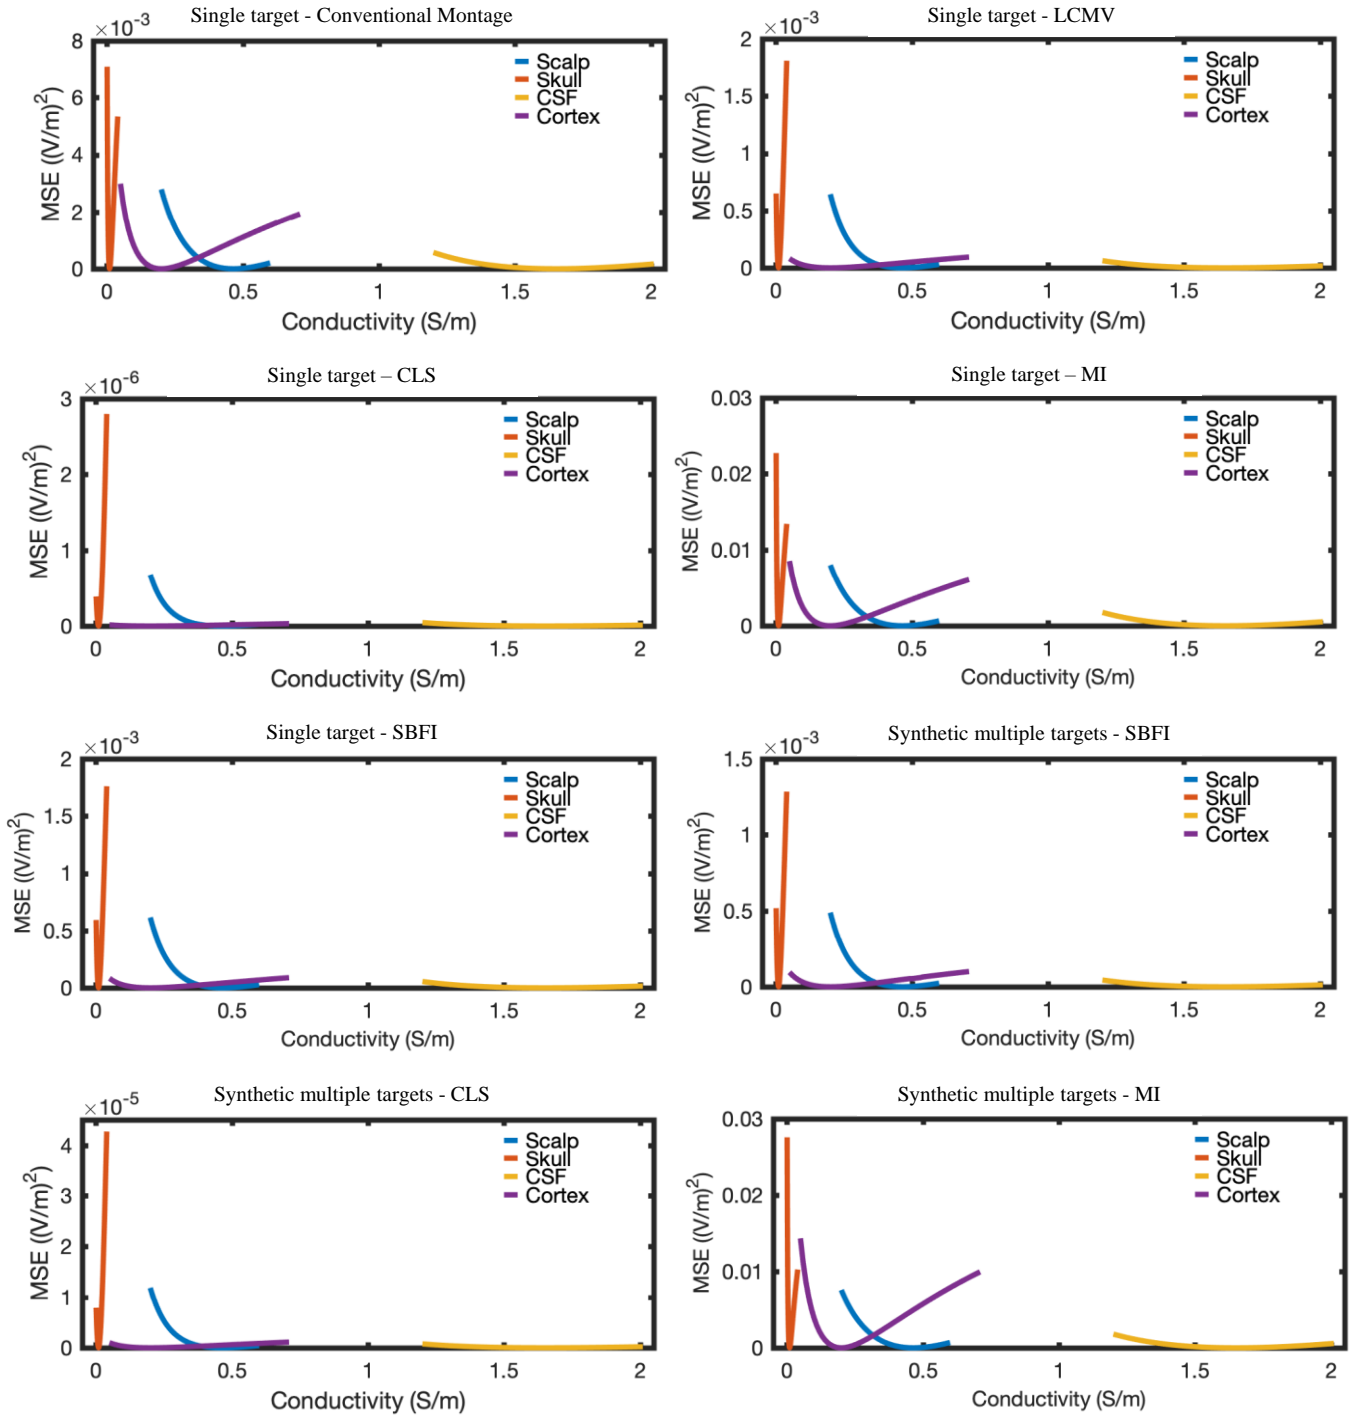

**Supplementary Figure S1.** Mean Square Error (MSE) between expected electric field  $e_{3n \times 1}$  and electric field  $e'_{3n \times 1}$  due to the conductivity uncertainty with different optimization algorithm and different target types.

## Robustness test results - Intensity

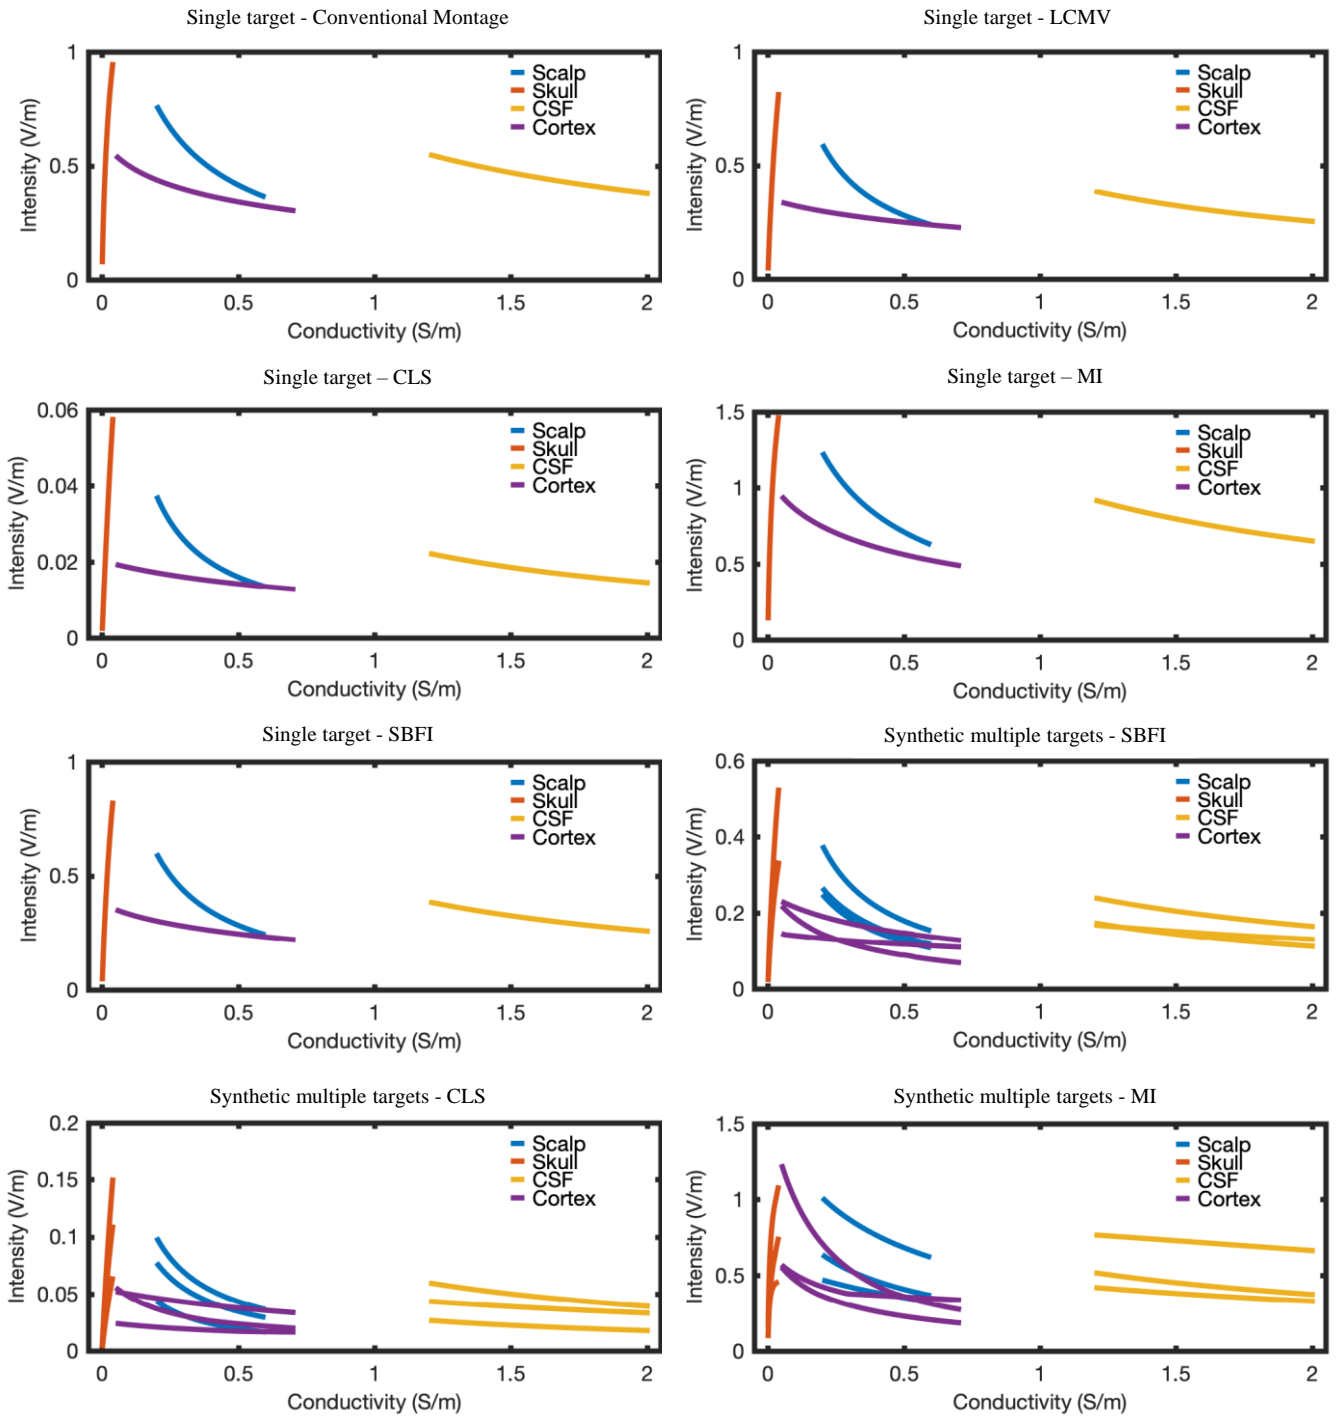

**Supplementary Figure S2.** Intensity changes due to conductivity uncertainty with different optimization algorithm and different target types.

## Robustness test results - TE

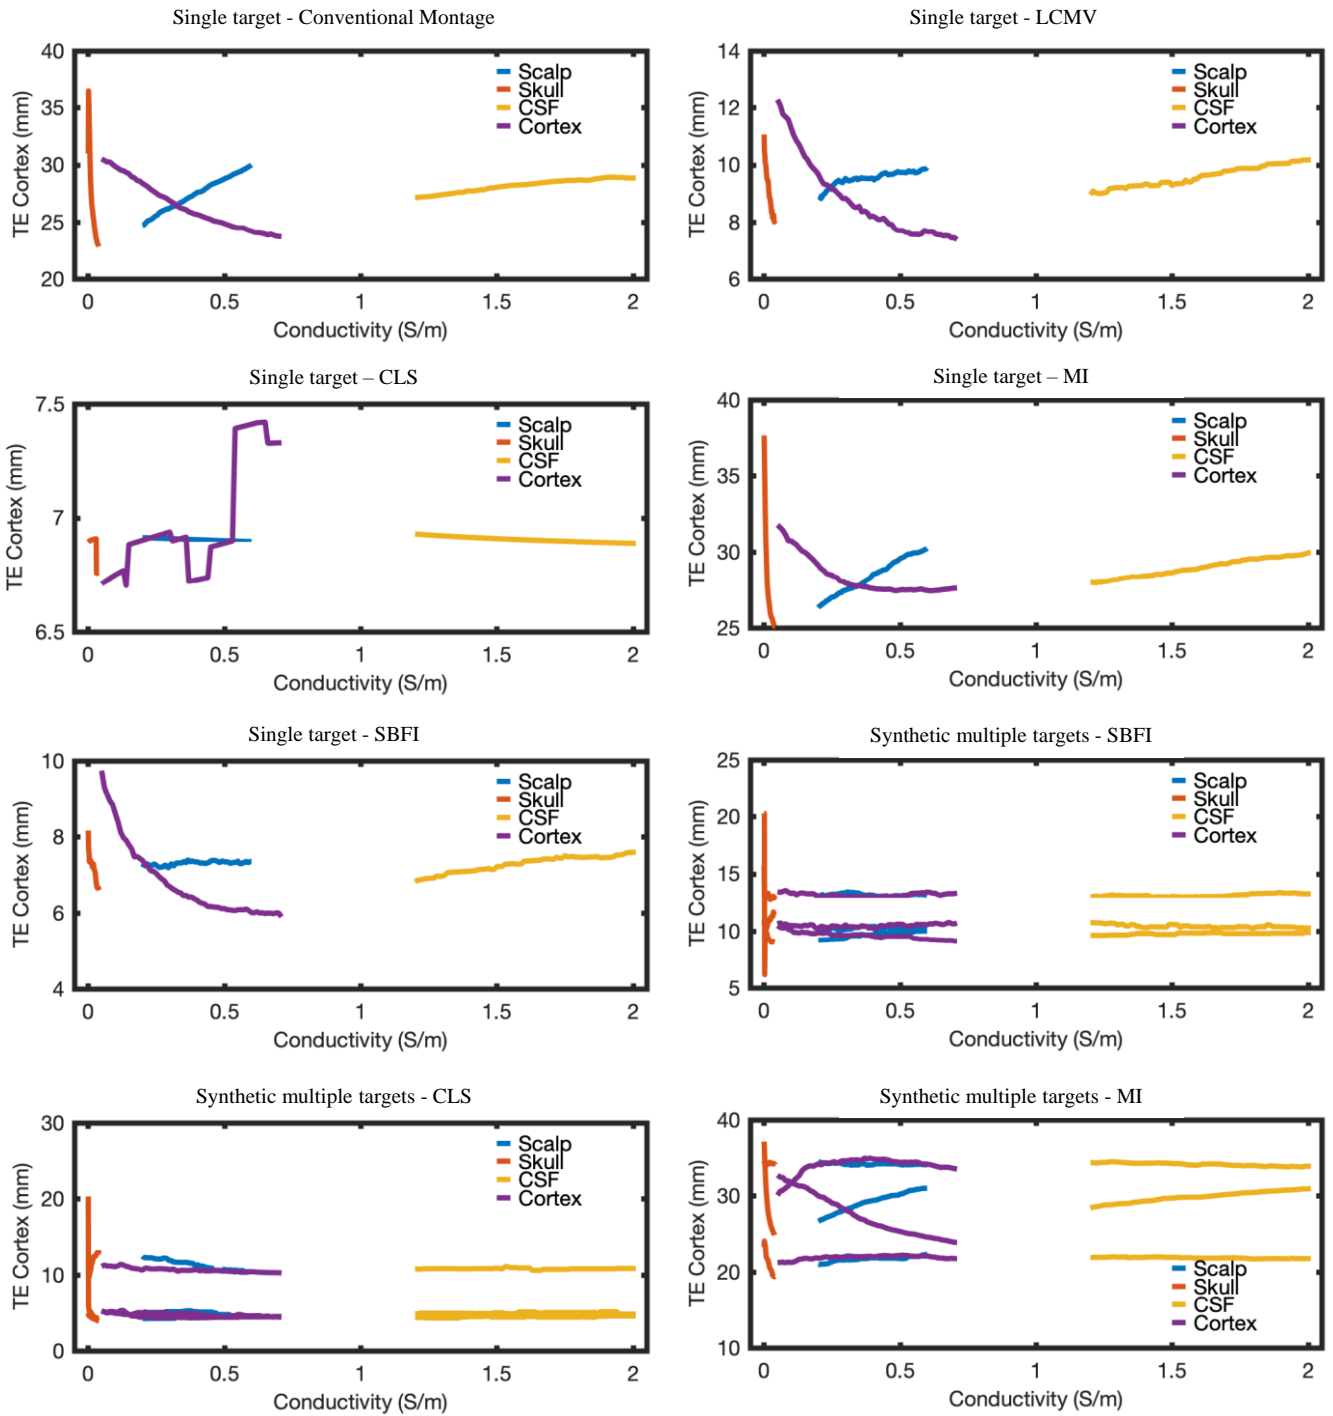

**Supplementary Figure S3.** TE changes due to conductivity uncertainty with different optimization algorithm and different target types.

## Robustness test results - Focality

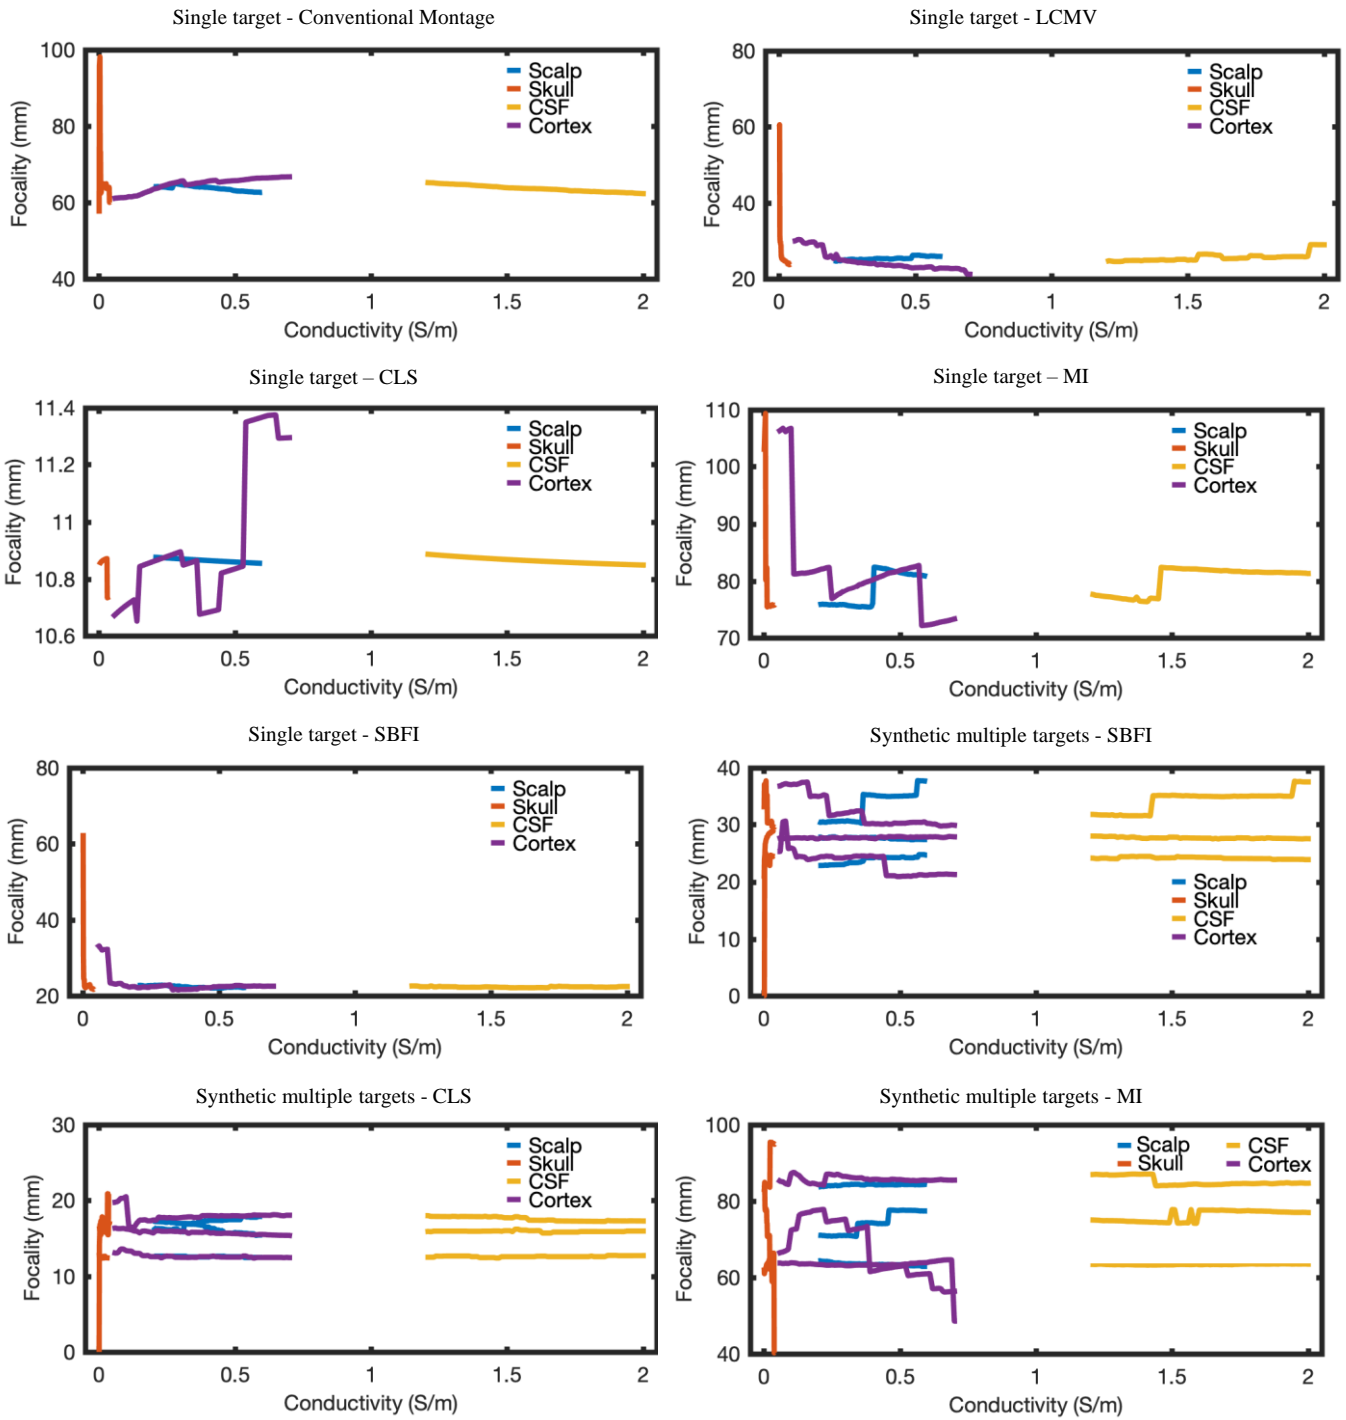

**Supplementary Figure S4.** Focality changes due to conductivity uncertainty with different optimization algorithm and different target types.

**Supplementary Table S1.** Synthetic multiple targets dissimilarity results of the robustness test

| Multiple Targets |            |                       |        |                       |
|------------------|------------|-----------------------|--------|-----------------------|
| Tissue           | $\sigma$   | SBFI                  | MI     | CLS                   |
| Scalp            | 0.2-0.6    | $4.67 \times 10^{-4}$ | 0.0084 | $5.01 \times 10^{-6}$ |
|                  |            | $4.99 \times 10^{-4}$ | 0.0040 | $1.65 \times 10^{-5}$ |
|                  |            | $5.31 \times 10^{-4}$ | 0.0118 | $2.24 \times 10^{-5}$ |
| Skull            | 0.001-0.04 | 0.0012                | 0.0269 | $1.82 \times 10^{-5}$ |
|                  |            | 0.0016                | 0.0210 | $6.30 \times 10^{-5}$ |
|                  |            | 0.0010                | 0.0409 | $7.30 \times 10^{-5}$ |
| CSF              | 1.20-2.01  | $5.29 \times 10^{-5}$ | 0.0019 | $4.12 \times 10^{-7}$ |
|                  |            | $3.84 \times 10^{-5}$ | 0.0015 | $1.12 \times 10^{-6}$ |
|                  |            | $3.18 \times 10^{-5}$ | 0.0020 | $1.11 \times 10^{-6}$ |
| Cortex           | 0.05-0.71  | $9.74 \times 10^{-5}$ | 0.0159 | $3.71 \times 10^{-7}$ |
|                  |            | $7.13 \times 10^{-5}$ | 0.0077 | $1.01 \times 10^{-6}$ |
|                  |            | $1.65 \times 10^{-4}$ | 0.0219 | $3.72 \times 10^{-6}$ |

**Supplementary Table S2.** Synthetic multiple targets intensity results of the robustness test

| Multiple Targets |            |               |               |        |
|------------------|------------|---------------|---------------|--------|
| Tissue           | $\sigma$   | Max Intensity | Min Intensity | Rate   |
| Scalp            | 0.2-0.6    | 0.2487        | 0.1077        | 0.3526 |
|                  |            | 0.3775        | 0.1530        | 0.5611 |
|                  |            | 0.2658        | 0.1170        | 0.3719 |
| Skull            | 0.001-0.04 | 0.3319        | 0.0176        | 8.0589 |
|                  |            | 0.5299        | 0.0238        | 12.975 |
|                  |            | 0.3373        | 0.0193        | 8.1548 |
| CSF              | 1.20-2.01  | 0.1735        | 0.1116        | 0.0764 |
|                  |            | 0.2399        | 0.1639        | 0.0938 |
|                  |            | 0.1683        | 0.1299        | 0.0473 |
| Cortex           | 0.05-0.71  | 0.1464        | 0.1096        | 0.0558 |
|                  |            | 0.2306        | 0.1275        | 0.1561 |
|                  |            | 0.2190        | 0.0684        | 0.2281 |

**Supplementary Table S3.** Synthetic multiple targets TE results of the robustness test

| Multiple Targets |            |        |        |        |
|------------------|------------|--------|--------|--------|
| Tissue           | $\sigma$   | Max TE | Min TE | Rate   |
| Scalp            | 0.2-0.6    | 13.419 | 13.013 | 1.0129 |
|                  |            | 9.9963 | 9.1801 | 2.0406 |
|                  |            | 10.445 | 9.9791 | 1.1639 |
| Skull            | 0.001-0.04 | 15.727 | 12.758 | 76.13  |
|                  |            | 10.948 | 8.9889 | 50.229 |
|                  |            | 20.276 | 6.1442 | 362.35 |
| CSF              | 1.20-2.01  | 13.35  | 12.957 | 0.4853 |
|                  |            | 9.8767 | 9.6118 | 0.3270 |
|                  |            | 10.744 | 10.232 | 0.6327 |
| Cortex           | 0.05-0.71  | 13.544 | 12.901 | 0.9750 |
|                  |            | 10.478 | 9.0941 | 2.0975 |
|                  |            | 10.77  | 10.129 | 0.9715 |

**Supplementary Table S4.** Synthetic multiple targets focality results of the robustness test

| Multiple Targets |            |              |              |         |
|------------------|------------|--------------|--------------|---------|
| Tissue           | $\sigma$   | Max Focality | Min Focality | Rate    |
| Scalp            | 0.2-0.6    | 37.785       | 30.202       | 18.958  |
|                  |            | 24.751       | 24.751       | 24.751  |
|                  |            | 27.838       | 27.346       | 1.2317  |
| Skull            | 0.001-0.04 | 37.744       | 29.499       | 211.4   |
|                  |            | 25.005       | 20.542       | 114.45  |
|                  |            | 29.092       | 0            | 745.95  |
| CSF              | 1.20-2.01  | 37.678       | 31.484       | 7.6467  |
|                  |            | 24.442       | 23.869       | 0.7081  |
|                  |            | 27.987       | 27.473       | 0.6349  |
| Cortex           | 0.05-0.71  | 37.52        | 29.707       | 11.838  |
|                  |            | 30.605       | 20.917       | 14.679  |
|                  |            | 27.912       | 27.485       | 0.64668 |
